# Supplementary material
Source: PubMed Central journal article supplement (PMC3791867)

## SUPPLEMENTAL MATERIALS

### Supplemental materials and methods

*N*-glycosidase treatment of *MEGF10*. For *N*-glycosidase treatment, wild type *MEGF10* and C774R mutant *MEGF10* were overexpressed in HEK293T cells, then 2.5 µg of protein were denatured and treated with *N*-glycosidase (PNGase F, New England BioLabs) at 37°C for 5 hours according to the manufacturer's protocol. Glycosidase treated proteins were lysed with SDS-PAGE sample buffer then subjected to western blot analysis.

**Supplemental Table 1.** Primers used for cloning and mutagenesis.

|                                    | forward                                | Reverse                              |
|------------------------------------|----------------------------------------|--------------------------------------|
| human <i>MEGF10</i> cloning primer | CACCCTCGAG ATGGTTATTTCTTTGAACTCATGCCTG | GGTACCTTCACTGCTGCTGCTGCTGTT          |
| deletion 1 mutagenesis             | ATGGGAAAATCCTTAAAAGACCTGG              | AATAATGAACAATGCCAGTAGGAAGAGAA        |
| deletion 2 mutagenesis             | GACCTCCAAAGAACAGTCACATC                | TTCAGAATTTCTTCCAGGTCTTTTAAAG         |
| Y906F mutagenesis                  | CGTCAATGCAGATTTTACCATTTTCAGGAACCC      | GGGTTCTGAAATGGTAAATCTGCATTGACG       |
| Y930F mutagenesis                  | CACCAATCCCAGTTTCCACACGCTCACCC          | GGGTGAGCGTGTGGAACTGGGATTGGTG         |
| Y1016F mutagenesis                 | CTGGGAAAGAATTCTGAATTTAATCAAGTAACTGCTC  | GAGCAGTTACTTGAATTAATTCAGAATTTCTTCCAG |
| Y1030F mutagenesis                 | CTGAGAACCCTTTGCCACTATTAAGACCC          | GGGTCTTAAATAGTGGCAAATGGGTTCTCAG      |
| Y1048F mutagenesis                 | GCTCAGAGTGTGGTTTTGTGGAGATGAAATCG       | CGATTTTCATCTCCACAAAACCACACTCTGAGC    |
| Y1061F mutagenesis                 | GAAGAGATCCCCATTTGCAGAGATCAATAAC        | GTTATTGATCTCTGCAAATGGGAATCTCTTC      |
| Y1075F mutagenesis                 | CAGGAATGTCTTTGAAGTTGAACCTACAGTG        | CACTGTAGGTTCAACTTCAAAGACATTCTG       |
| Y1099F mutagenesis                 | CTCCCAGGATCCATTTGACCTCCCAAAG           | CTTTGGGAGGTCAAATGGATCCTGGGAG         |
| Y1111F mutagenesis                 | CATCCCTTGTCATTTTGAAGTTGAACCTACAGTG     | CTGGCAGCAGGTCAAATGACAAGGGATG         |
| Y1030D mutagenesis                 | CTGAGAACCAGATGCCACTATTAAGACCC          | GGGTCTTAAATAGTGGCATCTGGGTTCTCAG      |
| C759S mutagenesis                  | GATTGTGCACTGATATCCCAATGTCAAACCGG       | CCGTTTTGACATTGGGATATCAGTGCAACAATC    |
| C761S mutagenesis                  | CACTGATATGCCAATCTCAAACGGAGCTGAC        | GTCAGCTCCGTTTTGAGATTGGCATATCAGTG     |
| C767S mutagenesis                  | CAAAACGGAGCTGACTCCGACCACATTTCTG        | CAGAAATGTGGTGGAGTCACTCCGTTTTTG       |
| C776S mutagenesis                  | CTGGGCAGTGTACTTCCCGCACTGGATTTC         | GAATCCAGTGCGGAAAGTACTGCCCCAG         |
| C785S mutagenesis                  | CATGGGACGGCACTCTGAGCAGAAGTG            | CACTTCTGCTCAGAGTGCCCGTCCCATG         |
| c-src K297R mutagenesis            | GGTGCCATCAGAACCCTGAAGCCTGG             | CCAGGCTTCAGGGTTCTGATGGCCACC          |

### Supplemental figure 1

(A) Overexpression of wild type *MEGF10*, C774R mutant *MEGF10*, and Y1030F mutant *MEGF10* in C2C12 cells. Proteins were immunoprecipitated with anti-V5 antibody and subjected to western blotting. Wild type *MEGF10* is phosphorylated whereas C774R and Y1030F mutants show defective phosphorylation. (B) Wild type, C326R mutant, and C774R mutant *MEGF10* were transfected into C2C12 cells and stained with anti-V5 antibody (green). Wild type and mutant *MEGF10* proteins display similar patterns of subcellular localization. Scale bar: 10µm.

### Supplemental figure 2

Wild type *MEGF10* and empty vector were transfected into HEK293T cells. Cell lysates were immunoprecipitated with anti-P-Tyr antibody (PY20; BD Bioscience) and immunodetected with anti-P-Tyr or anti-V5 antibodies. V5-tagged *MEGF10* was immunoprecipitated with anti-P-Tyr antibody.

### **Supplemental figure 3**

Wild type MEGF10 and C774R mutant MEGF10 were transfected into HEK293T cells. Cell lysates were treated with *N*-glycosidase, then subjected to immunodetection with anti-V5 antibody.

*N*-glycosidase treated wild type MEGF10 and C774R mutant MEGF10 show similar migration patterns at ~100kDa. PNGase: *N*-glycosidase.

### **Supplemental figure 4**

Wild type MEGF10 was co-transfected into HEK293T cells with pcDNA3.1-Myc vector (mock), Myc-tagged c-Src, or Myc-tagged dominant-negative c-Src (dn). Cell lysates were immunoprecipitated with anti-V5 antibody, then subjected to immunodetection with anti-P-Tyr or anti-V5 antibodies. Note that the applied protein amount is half of the amount in the experiments illustrated in Figures 1 and 2, as co-expression of c-Src causes a marked increase in tyrosine phosphorylation. Co-expression of dominant-negative c-Src (dn) with wild type MEGF10 shows decreased tyrosine phosphorylation compared to wild type MEGF10 co-expressed with empty vector. The dominant negative form of c-Src (dn) was not co-immunoprecipitated with MEGF10, whereas wild type c-Src was co-immunoprecipitated with MEGF10.

### **Supplemental figure 5**

(A) C2C12 myoblasts were infected with lentiviral vectors to introduce wild type MEGF10, Y1030F mutant MEGF10, Y1030D mutant MEGF10, or empty vector. We quantified the percentage of Ki-67 positive cells by counting approximately 500 cells. Anti-Ki-67 (BD Pharmingen Inc.) was used for immunofluorescence analysis. Both wild type MEGF10 and Y1030D infected cells showed increased numbers of Ki-67 positive cells. (B) Fluorescent image of Ki-67 positive cells (green) showing the increase of cell proliferation in wild type MEGF10 and Y1030D mutant MEGF10 expressing C2C12 cells.

# Supplementary figure 1

## A

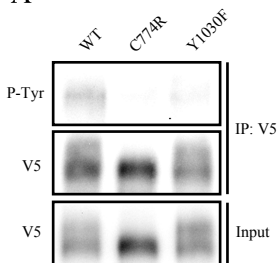

## B

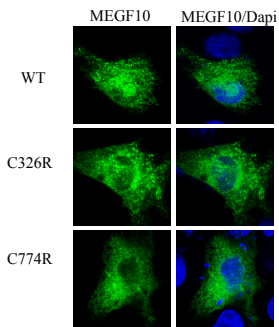

Supplementary figure 2

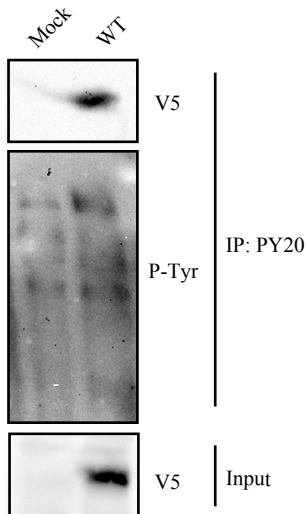



### Supplementary figure 3

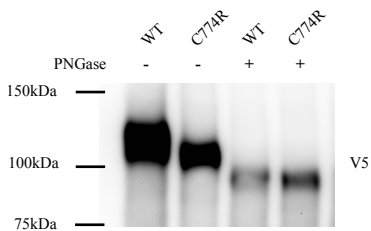

Supplementary figure 4

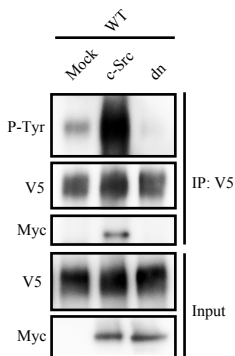

## Supplementary figure 5

A

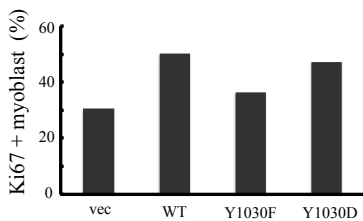

B

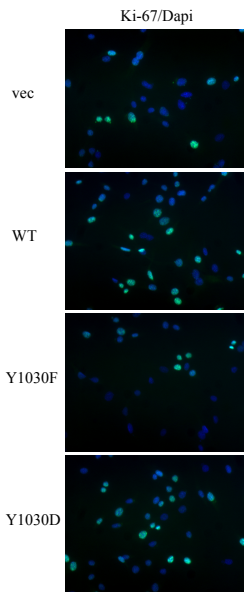

Supplement: NIHMS516551-supplement-01.pdf [file NIHMS516551-supplement-01.pdf]
